# Supplementary material for: Effect of Land Use Conversion on Surface Soil Heavy Metal Contamination in a Typical Karst Plateau Lakeshore Wetland of Southwest China
Source: PubMed Central journal article supplement (PMC6982003; doi:10.3390/ijerph17010084), 2019-12-20
Supplement: ijerph-17-00084-s001.pdf [file ijerph-17-00084-s001.pdf]

**Table S1.** Post-test results of multiple comparison for heavy metal content in different land use types.

| <b>Heavy metal</b> | <b>Land use types</b> | <b>Land use types</b> | <b>Significance test (<i>P</i> value)</b> |
|--------------------|-----------------------|-----------------------|-------------------------------------------|
| Cr                 | farmland              | grassland             | 0.467                                     |
|                    |                       | woodland              | 0.021                                     |
|                    | grassland             | farmland              | 0.467                                     |
|                    |                       | woodland              | 0.085                                     |
|                    | woodland              | farmland              | 0.021                                     |
|                    |                       | grassland             | 0.085                                     |
| Cu                 | farmland              | grassland             | 0.549                                     |
|                    |                       | woodland              | 0.050                                     |
|                    | grassland             | farmland              | 0.549                                     |
|                    |                       | woodland              | 0.144                                     |
|                    | woodland              | farmland              | 0.050                                     |
|                    |                       | grassland             | 0.144                                     |
| Zn                 | farmland              | grassland             | 0.656                                     |
|                    |                       | woodland              | 0.266                                     |
|                    | grassland             | farmland              | 0.656                                     |
|                    |                       | woodland              | 0.476                                     |
|                    | woodland              | farmland              | 0.266                                     |
|                    |                       | grassland             | 0.476                                     |
| As                 | farmland              | grassland             | 0.59                                      |
|                    |                       | woodland              | 0.184                                     |
|                    | grassland             | farmland              | 0.590                                     |
|                    |                       | woodland              | 0.395                                     |
|                    | woodland              | farmland              | 0.184                                     |
|                    |                       | grassland             | 0.395                                     |
| Hg                 | farmland              | grassland             | 0.844                                     |
|                    |                       | woodland              | 0.096                                     |
|                    | grassland             | farmland              | 0.844                                     |
|                    |                       | woodland              | 0.128                                     |
|                    | woodland              | farmland              | 0.096                                     |
|                    |                       | grassland             | 0.128                                     |
| Pb                 | farmland              | grassland             | 0.807                                     |
|                    |                       | woodland              | 0.306                                     |
|                    | grassland             | farmland              | 0.807                                     |
|                    |                       | woodland              | 0.416                                     |
|                    | woodland              | farmland              | 0.306                                     |
|                    |                       | grassland             | 0.416                                     |
| Cd                 | farmland              | grassland             | 0.039                                     |
|                    |                       | woodland              | 0.016                                     |
|                    | grassland             | farmland              | 0.039                                     |
|                    |                       | woodland              | 0.611                                     |
|                    | woodland              | farmland              | 0.016                                     |
|                    |                       | grassland             | 0.611                                     |

**Table S2.** Correlations analysis of heavy metals in surface soil of different land use types.

| <b>Correlation test</b> |                                               | <b>Cr</b> | <b>Cu</b> | <b>Zn</b> | <b>As</b> | <b>Hg</b> | <b>Pb</b> | <b>Cd</b> |
|-------------------------|-----------------------------------------------|-----------|-----------|-----------|-----------|-----------|-----------|-----------|
| Cr                      | Correlation coefficient (Pearson)             | 1         |           |           |           |           |           |           |
|                         | Significance test- <i>P</i> value (bilateral) |           |           |           |           |           |           |           |
| Cu                      | Correlation coefficient (Pearson)             | 0.776**   | 1         |           |           |           |           |           |
|                         | Significance test- <i>P</i> value (bilateral) | 0.008     |           |           |           |           |           |           |
| Zn                      | Correlation coefficient (Pearson)             | 0.864**   | 0.860**   | 1         |           |           |           |           |
|                         | Significance test- <i>P</i> value (bilateral) | 0.001     | 0.001     |           |           |           |           |           |
| As                      | Correlation coefficient (Pearson)             | 0.481     | 0.814**   | 0.662*    | 1         |           |           |           |
|                         | Significance test- <i>P</i> value (bilateral) | 0.159     | 0.004     | 0.037     |           |           |           |           |
| Hg                      | Correlation coefficient (Pearson)             | -0.035    | -0.463    | -0.194    | -0.62     | 1         |           |           |
|                         | Significance test- <i>P</i> value (bilateral) | 0.923     | 0.178     | 0.591     | 0.056     |           |           |           |
| Pb                      | Correlation coefficient (Pearson)             | 0.357     | -0.154    | 0.118     | -0.498    | 0.695*    | 1         |           |
|                         | Significance test- <i>P</i> value (bilateral) | 0.312     | 0.671     | 0.745     | 0.143     | 0.026     |           |           |
| Cd                      | Correlation coefficient (Pearson)             | 0.847**   | 0.641*    | 0.835**   | 0.634*    | -0.116    | 0.169     | 1         |
|                         | Significance test- <i>P</i> value (bilateral) | 0.002     | 0.046     | 0.003     | 0.049     | 0.750     | 0.642     |           |
| Cr                      | Correlation coefficient (Pearson)             | 1         |           |           |           |           |           |           |
|                         | Significance test- <i>P</i> value (bilateral) |           |           |           |           |           |           |           |
| Cu                      | Correlation coefficient (Pearson)             | 0.484     | 1         |           |           |           |           |           |
|                         | Significance test- <i>P</i> value (bilateral) | 0.131     |           |           |           |           |           |           |
| Zn                      | Correlation coefficient (Pearson)             | 0.742**   | 0.775**   | 1         |           |           |           |           |
|                         | Significance test- <i>P</i> value (bilateral) | 0.009     | 0.005     |           |           |           |           |           |
| As                      | Correlation coefficient (Pearson)             | 0.166     | 0.642*    | 0.416     | 1         |           |           |           |
|                         | Significance test- <i>P</i> value (bilateral) | 0.626     | 0.033     | 0.203     |           |           |           |           |
| Hg                      | Correlation coefficient (Pearson)             | -0.423    | -0.739**  | -0.587    | -0.691*   | 1         |           |           |
|                         | Significance test- <i>P</i> value (bilateral) | 0.195     | 0.009     | 0.058     | 0.018     |           |           |           |
| Pb                      | Correlation coefficient (Pearson)             | 0.526     | 0.093     | 0.480     | -0.518    | 0.116     | 1         |           |
|                         | Significance test- <i>P</i> value (bilateral) | 0.096     | 0.785     | 0.135     | 0.103     | 0.735     |           |           |
| Cd                      | Correlation coefficient (Pearson)             | 0.434     | 0.821**   | 0.849**   | 0.593     | -0.634*   | 0.098     | 1         |

|    |                                               |         |         |         |       |        |        |   |
|----|-----------------------------------------------|---------|---------|---------|-------|--------|--------|---|
|    | Significance test- <i>P</i> value (bilateral) | 0.182   | 0.002   | 0.001   | 0.054 | 0.036  | 0.774  |   |
| Cr | Correlation coefficient (Pearson)             | 1       |         |         |       |        |        |   |
|    | Significance test- <i>P</i> value (bilateral) |         |         |         |       |        |        |   |
| Cu | Correlation coefficient (Pearson)             | 0.632   | 1       |         |       |        |        |   |
|    | Significance test- <i>P</i> value (bilateral) | 0.068   |         |         |       |        |        |   |
| Zn | Correlation coefficient (Pearson)             | 0.893** | .835**  | 1       |       |        |        |   |
|    | Significance test- <i>P</i> value (bilateral) | 0.001   | 0.005   |         |       |        |        |   |
| As | Correlation coefficient (Pearson)             | 0.284   | 0.879** | 0.556   | 1     |        |        |   |
|    | Significance test- <i>P</i> value (bilateral) | 0.459   | 0.002   | 0.12    |       |        |        |   |
| Hg | Correlation coefficient (Pearson)             | 0.116   | 0.26    | 0.122   | 0.069 | 1      |        |   |
|    | Significance test- <i>P</i> value (bilateral) | 0.766   | 0.5     | 0.755   | 0.86  |        |        |   |
| Pb | Correlation coefficient (Pearson)             | 0.606   | 0.278   | 0.650   | 0.021 | -0.073 | 1      |   |
|    | Significance test- <i>P</i> value (bilateral) | 0.084   | 0.468   | 0.058   | 0.956 | 0.851  |        |   |
| Cd | Correlation coefficient (Pearson)             | 0.879** | 0.722*  | 0.976** | 0.439 | 0.110  | 0.719* | 1 |
|    | Significance test- <i>P</i> value (bilateral) | 0.002   | 0.028   | 0.000   | 0.238 | 0.779  | 0.029  |   |

Note: \*\*correlation is significant at the 0.01 level (2-tailed);\*correlation is significant at the 0.05 level (2-tailed).
